# Supplementary material for: Multicenter, cluster-based, superiority trial of a multicomponent lifestyle intervention versus usual care for reducing cardiometabolic risk in individuals with psychotic disorders over 36 months: the LAGOM protocol
Source: Research Square preprint supplement (doi:10.21203/rs.3.rs-7972355/v1), 2026-01-20
Supplement: Supplementary file 1 [file 8f445a9ef06e26a600f96412.pdf]

Supplementary table 1. Contents of the worksheet

| Section                           | Item                                                                                                                                            | Time frame     | Source of information |
|-----------------------------------|-------------------------------------------------------------------------------------------------------------------------------------------------|----------------|-----------------------|
| Administrative Information        | CM Name, Physician Name, Personal ID Number, Name, Age                                                                                          |                |                       |
| Sex and Gender                    | Biological Sex (Female, Male), Gender Identity (Female, Male, Other, Prefer not to say)                                                         |                | F, R                  |
| Social and Background Information | Date of Information Collection                                                                                                                  |                | F, M, R               |
|                                   | Ethnic background (country of birth: self, parents, grandparents)                                                                               |                |                       |
|                                   | Relationship status, Living situation, Household members                                                                                        |                |                       |
|                                   | Having children (biological, adopted, stepchildren, or foster children) and their number                                                        |                |                       |
|                                   | Housing type (Ordinary, Special, Other, Homeless)                                                                                               |                |                       |
|                                   | Assistance received (e.g., guardian, trustee, home care, informal support)                                                                      |                |                       |
|                                   | Employment/Social Engagement Status (detailed options like open market work, sheltered employment, studies, rehabilitation, day activity, etc.) | Last 12 months |                       |
|                                   | Sick leave (duration and degree (%), current status)                                                                                            | Last 12 months |                       |
|                                   | Permanent disability or activity compensation (status, degree (%), year granted)                                                                |                |                       |
|                                   | Education level (highest completed level), Total years of education                                                                             |                |                       |
| Medical History                   | Family history of angina or heart attack (before age 60)                                                                                        |                | F, M, R               |
|                                   | Age at first psychiatric contact                                                                                                                |                |                       |
|                                   | Age and type of first psychiatric symptoms                                                                                                      |                |                       |
|                                   | Previous or current somatic disorders (selection list)                                                                                          |                |                       |

|                  |                                                                                                                                                                    |                                              |         |
|------------------|--------------------------------------------------------------------------------------------------------------------------------------------------------------------|----------------------------------------------|---------|
|                  | Erectile dysfunction (men), Diagnosis/treatment for ED                                                                                                             |                                              |         |
|                  | Aortic ultrasound (men $\geq 65$ years)                                                                                                                            |                                              |         |
|                  | Regular pap smear (women 23–64 years), Regular mammography (women 40–73 years)                                                                                     |                                              |         |
|                  | Dental care support (need and justification)                                                                                                                       |                                              |         |
|                  | Use of steroids (oral/injection)                                                                                                                                   |                                              |         |
|                  | Antipsychotic medication (drugs used, treatment purpose)                                                                                                           |                                              |         |
|                  | Antihypertensives (drugs used, treatment purpose)                                                                                                                  |                                              |         |
|                  | Lipid-lowering drugs                                                                                                                                               |                                              |         |
|                  | Diabetes medication (drugs used, purpose: diabetes/obesity)                                                                                                        |                                              |         |
|                  | Inpatient psychiatric care (frequency, days, compulsory care count)                                                                                                | Last 12 months                               |         |
|                  | ICD diagnosis code for psychotic disorder                                                                                                                          |                                              |         |
|                  | Year of first psychosis diagnosis                                                                                                                                  |                                              |         |
|                  | Comorbid psychiatric disorders (ICD codes)                                                                                                                         |                                              |         |
| Lifestyle Habits | Sleep<br><br>Sleep problems and interventions (e.g., medication, weighted blanket)                                                                                 |                                              | F, R, S |
|                  | Smoking<br><br>Status, start/stop age, quantity                                                                                                                    |                                              |         |
|                  | Snus (Swedish smokeless tobacco)<br><br>Same as above                                                                                                              |                                              |         |
|                  | Physical Activity<br><br>Daily activities: low- to moderate-intensity (walking, shopping, chores)<br><br>Physical exercise: to breathlessness (e.g., gym, running) | Typical day<br><br>during the last 12 months |         |
|                  |                                                                                                                                                                    |                                              |         |

|                      |                                                                                                                                                                                                                                         |                |      |
|----------------------|-----------------------------------------------------------------------------------------------------------------------------------------------------------------------------------------------------------------------------------------|----------------|------|
|                      | <p>Sedentary time: sleeping, napping, screen time</p> <p>Total time (active + sedentary + sleep) should sum to 24h</p>                                                                                                                  |                |      |
|                      | <p>Dietary Index</p> <p>Frequency of vegetables, fruits, fish, sweets/snacks, breakfast; Dietary Index score (0–12)</p>                                                                                                                 | Last 12 months |      |
|                      | <p>Alcohol (AUDIT-C)</p> <p>Frequency of drinking, quantity per session, binge drinking, AUDIT-C score</p>                                                                                                                              | Last 12 months |      |
|                      | <p>Substance Use Disorders</p> <p>Including alcohol, cannabis, opiates, sedatives, tobacco, stimulants (e.g., caffeine) (per ICD F-codes)</p>                                                                                           |                |      |
| Physical Examination | <p>Date, Time, BP, Pulse, Height, Weight, Waist &amp; Hip circumference</p>                                                                                                                                                             |                | F    |
|                      | <p>Body composition via TANITA body composition analyzer*: fat mass, muscle mass, water, bone mass, metabolic age</p>                                                                                                                   |                |      |
| Blood Tests          | <p>Date/time of test</p> <p>Fasting status (Yes/No) and number of fasting hours</p> <p>P-CRP, P-Creatinine, eGFR, P-AST, P-ALT, P-ALP, P-Bilirubin, P-Glucose, B-HbA1c, P-Cholesterol (Total, LDL, HDL, non-HDL), P-Triacylglycerol</p> |                | F, M |
| Assessment Scales    | <p>EQ-5D-5L</p> <p>Mobility, Personal care, Usual activities, Pain/discomfort, Anxiety/depression, Self-rated health (0–100)</p>                                                                                                        |                | F, S |
|                      | <p>Metabolic Syndrome*</p> <p>Defined by waist size, triglycerides, HDL, BP, glucose</p>                                                                                                                                                |                |      |
|                      | SCORE2 & QRISK3*                                                                                                                                                                                                                        |                |      |

|                                                                                                                                                                                                                                                                                                                                                                                                                                                                                                                              |                                                                                                        |                    |         |
|------------------------------------------------------------------------------------------------------------------------------------------------------------------------------------------------------------------------------------------------------------------------------------------------------------------------------------------------------------------------------------------------------------------------------------------------------------------------------------------------------------------------------|--------------------------------------------------------------------------------------------------------|--------------------|---------|
|                                                                                                                                                                                                                                                                                                                                                                                                                                                                                                                              | CVD risk scores, Healthy heart age                                                                     |                    |         |
| Other Information                                                                                                                                                                                                                                                                                                                                                                                                                                                                                                            | Participation in LAGOM health education*                                                               | Last 12 months     | F, M, R |
|                                                                                                                                                                                                                                                                                                                                                                                                                                                                                                                              | Sessions with internal/external healthcare professionals on physical activity, diet, smoking, alcohol* | Last 12 months     |         |
|                                                                                                                                                                                                                                                                                                                                                                                                                                                                                                                              | Experience using TANITA and QRISK3*                                                                    |                    |         |
|                                                                                                                                                                                                                                                                                                                                                                                                                                                                                                                              | Adverse medical events (non-psychiatric)*                                                              | Since last control |         |
|                                                                                                                                                                                                                                                                                                                                                                                                                                                                                                                              | Reason for trial withdrawal (if applicable)                                                            |                    |         |
|                                                                                                                                                                                                                                                                                                                                                                                                                                                                                                                              |                                                                                                        |                    |         |
| * Only intervention clinics.                                                                                                                                                                                                                                                                                                                                                                                                                                                                                                 |                                                                                                        |                    |         |
| Abbreviations: B-HbA1c, Blood Hemoglobin A1c; BP, blood pressure; ED, erectile dysfunction; eGFR, estimated glomerular filtration rate; F, face-to-face interviews; M, medical records; P-ALP, Plasma Alkaline Phosphatase; P-ALT, Plasma Alanine Transaminase; P-AST, Plasma Aspartate Transaminase; P-CRP, Plasma C Reactive Protein; P-HDL, Plasma High Density Lipoprotein Cholesterol; P-LDL, Plasma Low Density Lipoprotein Cholesterol ; R, remote interviews; S, self-administered questionnaires completed at home. |                                                                                                        |                    |         |
